# Supplementary material for: Phytochemical Screening and Antioxidant and Cytotoxic Effects of Acacia macrostachya
Source: MDPI journal article supplement (doi:10.3390/plants10071353), 2021-07-02
Supplement: s1 [file s1]

Supplementary documents

# Phytochemical Screening and Antioxidant and Cytotoxic Effects of *Acacia macrostachya*

Hamidou Têda Ganamé <sup>1,2</sup>, Yssouf Karanga <sup>1,3</sup>, Issa Tapsoba <sup>1</sup>, Mario Dicato <sup>2</sup>, Marc F. Diederich <sup>4</sup>, Claudia Cerella <sup>2,†,\*</sup> and Richard Wamtinga Sawadogo <sup>5,†,\*</sup>

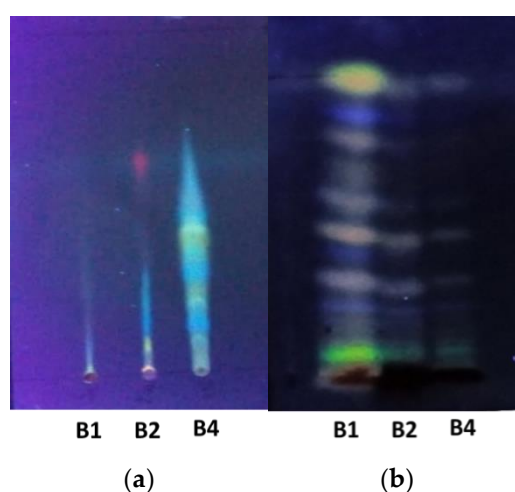

**Figure S1.** Qualitative phytochemical analysis by TLC. (a): Flavonoid; Mobile phase: Chloroform-Ethyl acetate (60/40 *v/v*); (b): Terpenoids/Steroids; Mobile phase: Hexane-Ethyl acetate (20/4 *v/v*). In the first plaque (a) submitted to UV light at 365 nm, the spots of flavonoids appear yellow, green, orange, or fluorescent blue. The second plate (b) revealed with the Liebermann-Burchard reagent characterize the presence of terpenoids and/or steroids in green and purple.

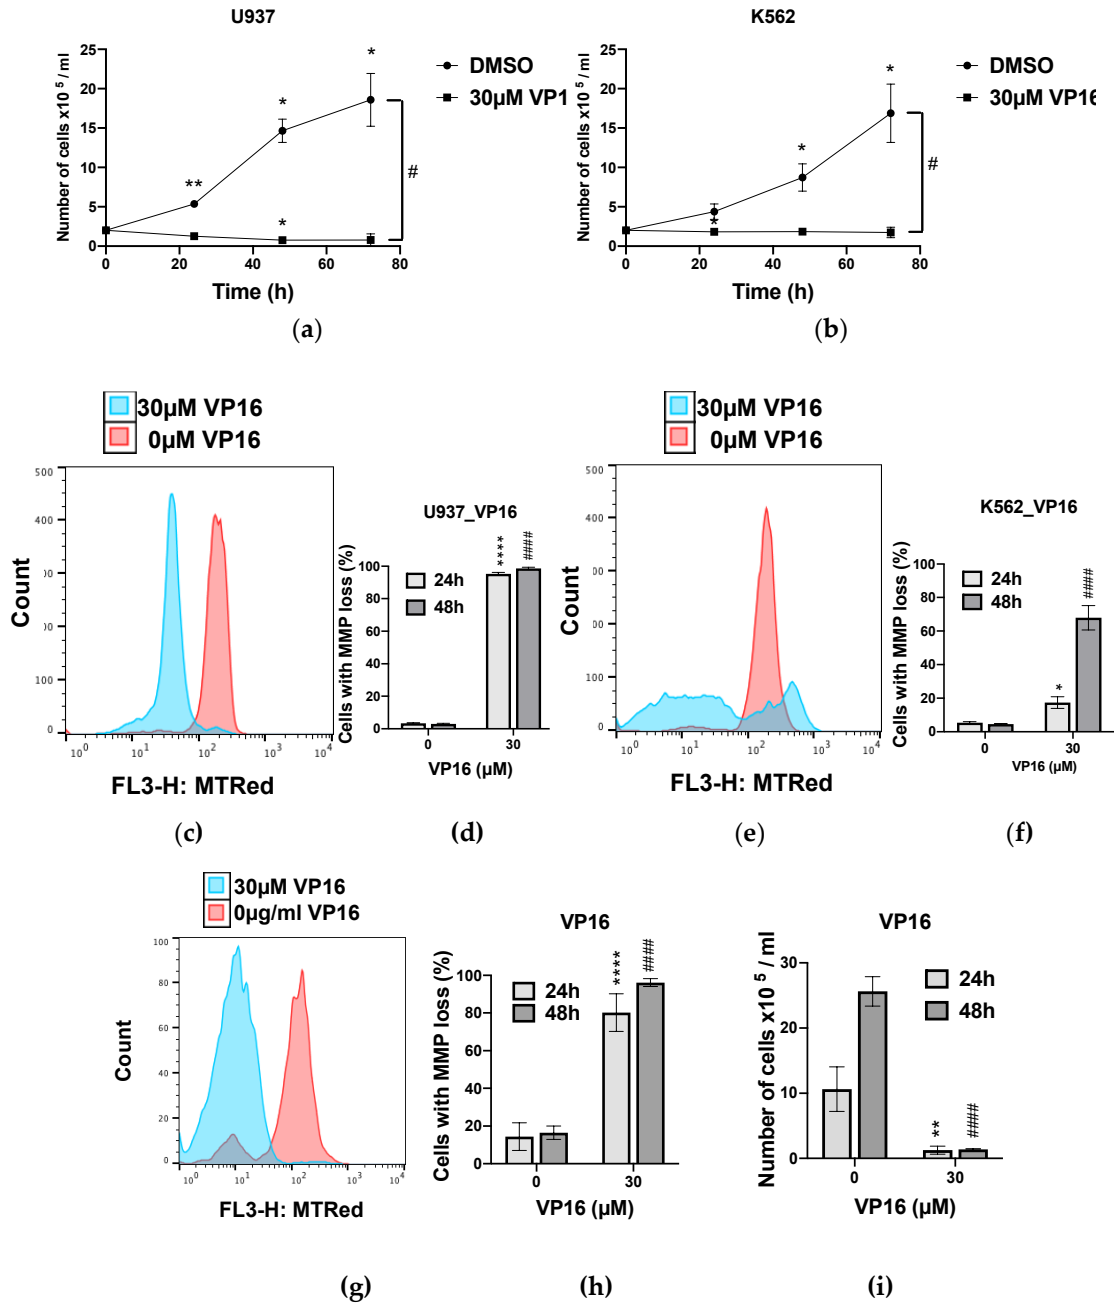

**Figure S2.** Effects of the positive control etoposide (VP16) on U937 (a, c, d), K562 (b, e, f) cells and proliferating PBMCs (g, h, i) by Hoechst and Mito Tracker® Red staining analysis and trypan bleu assay after 24h and 48h treatment; ANOVA Two-way; Post-hoc: Sidak \*,#:  $p < 0.05$ ; \*\*:  $p < 0.01$ ; \*\*\*, ####:  $p < 0.0001$ .

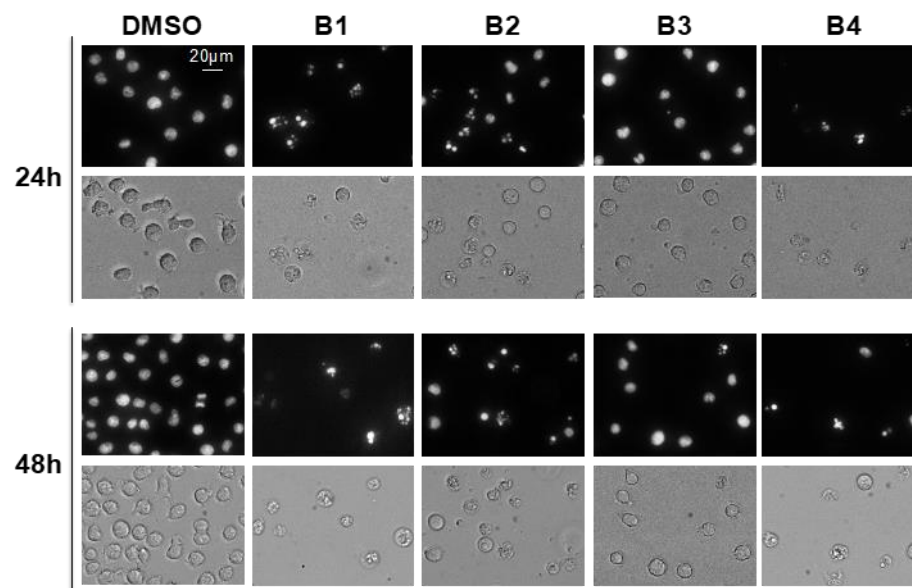

(a)

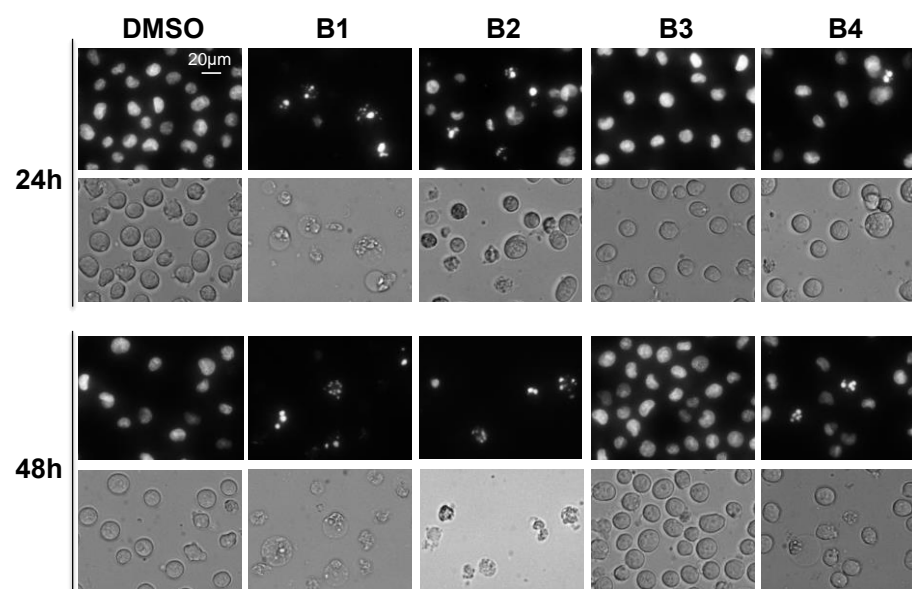

(b)

**Figure S3.** Apoptotic nuclear fragmentation induced by different extracts at 50 µg/mL in U937 (a) and K562 (b) cells was analyzed after Hoechst staining (one representative of three independent experiments).
